# Supplementary material for: LSA: a local-weighted structural alignment tool for pharmaceutical virtual screening
Source: Royal Society of Chemistry journal article supplement (doi:10.1039/c8ra08915a), 2019-01-01
Supplement: c8ra08915a1.pdf [file c8ra08915a1.pdf]

## LSA: a local-weighted structural alignment tool for pharmaceutical virtual screening

Xiuming Li<sup>§a</sup>, Xin Yan<sup>§\*a</sup>, Yuedong Yang<sup>c</sup>, Qiong Gu<sup>a</sup>, Huihao Zhou<sup>a</sup>, Yunfei Du<sup>c</sup>, Yutong Lu<sup>c</sup>, Jielou Liao<sup>d</sup>,  
and Jun Xu<sup>\*a,b</sup>

<sup>a</sup> Research Center for Drug Discovery, School of Pharmaceutical Sciences, Sun Yat-Sen University, 132 East Circle at University City,  
Guangzhou 510006, China

<sup>b</sup> School of Computer Science & Technology, Wuyi University, 99 Yingbin Road, Jiangmen 529020, China

<sup>c</sup> National Supercomputer Center in Guangzhou & School of data and computer science, Sun Yat-Sen University, 132 East Circle at University  
City, Guangzhou 510006, China

<sup>d</sup> Department of Chemical Physics, University of Science and Technology of China, Jinzhai Road. 96, Hefei 230026, China

§ Equal contributors. \*To whom correspondence should be addressed.

### Supplementary Materials

**Table S1.** AUC values and EF values of 102 compound libraries in DUD-E Collection by LSA and WEGA

| Target | LSA  |                  |                  |                   | WEGA |                  |                  |                   |
|--------|------|------------------|------------------|-------------------|------|------------------|------------------|-------------------|
|        | AUC  | EF <sup>1%</sup> | EF <sup>5%</sup> | EF <sup>10%</sup> | AUC  | EF <sup>1%</sup> | EF <sup>5%</sup> | EF <sup>10%</sup> |
| AA2AR  | 0.79 | 31.82            | 8.55             | 4.98              | 0.65 | 9.98             | 4.32             | 2.95              |
| ABL1   | 0.85 | 13.20            | 10.78            | 6.32              | 0.74 | 14.85            | 5.83             | 3.63              |
| ACE    | 0.98 | 21.91            | 18.92            | 9.62              | 0.76 | 11.14            | 5.34             | 3.87              |
| ACES   | 0.61 | 7.31             | 3.14             | 2.36              | 0.60 | 1.99             | 0.97             | 0.75              |
| ADA    | 0.99 | 45.65            | 19.64            | 9.91              | 0.91 | 40.21            | 14.89            | 8.51              |
| ADA17  | 0.86 | 27.68            | 10.80            | 6.58              | 0.84 | 19.39            | 9.63             | 6.07              |
| ADRB1  | 0.93 | 15.44            | 9.16             | 8.83              | 0.58 | 8.94             | 3.24             | 2.75              |
| ADRB2  | 0.89 | 16.52            | 8.66             | 8.19              | 0.60 | 2.61             | 1.47             | 1.00              |
| AKT1   | 0.68 | 0.34             | 0.34             | 0.31              | 0.48 | 3.77             | 1.57             | 1.30              |
| AKT2   | 0.84 | 4.32             | 4.97             | 5.05              | 0.68 | 12.10            | 4.97             | 3.17              |
| AMPC   | 0.86 | 1.00             | 1.00             | 1.00              | 0.86 | 0.04             | 1.00             | 1.00              |
| ALDR   | 0.73 | 23.98            | 6.67             | 4.03              | 0.70 | 30.92            | 8.69             | 4.97              |
| ANDR   | 0.75 | 18.30            | 6.92             | 4.46              | 0.76 | 19.79            | 7.21             | 4.61              |
| AOFB   | 0.52 | 3.28             | 1.64             | 1.81              | 0.54 | 0.82             | 1.97             | 1.40              |
| BACE1  | 0.81 | 6.36             | 11.03            | 6.19              | 0.68 | 3.55             | 2.41             | 2.12              |
| BRAF   | 0.75 | 35.59            | 7.78             | 4.87              | 0.73 | 32.55            | 8.30             | 4.48              |
| CAH2   | 0.88 | 5.29             | 5.21             | 5.53              | 0.51 | 1.22             | 1.55             | 1.40              |
| CASP3  | 0.72 | 3.02             | 5.93             | 4.37              | 0.60 | 9.55             | 3.22             | 2.46              |
| CDK2   | 0.77 | 15.24            | 5.66             | 3.92              | 0.73 | 7.81             | 4.69             | 3.52              |
| COMT   | 0.99 | 71.53            | 18.06            | 9.28              | 0.93 | 62.44            | 18.10            | 9.27              |
| CP2C9  | 0.60 | 5.88             | 3.34             | 2.09              | 0.55 | 5.88             | 2.17             | 1.42              |
| CP3A4  | 0.68 | 10.61            | 4.24             | 3.83              | 0.57 | 5.31             | 2.35             | 1.71              |
| CSF1R  | 0.80 | 23.60            | 6.51             | 4.16              | 0.75 | 27.83            | 7.48             | 4.34              |
| CXCR4  | 0.80 | 25.47            | 7.00             | 5.75              | 0.81 | 25.47            | 9.01             | 6.00              |

|        |      |       |       |       |      |       |       |       |
|--------|------|-------|-------|-------|------|-------|-------|-------|
| DEF    | 0.99 | 54.27 | 19.27 | 9.62  | 0.95 | 41.18 | 15.88 | 8.63  |
| DHI1   | 0.68 | 9.71  | 4.55  | 3.73  | 0.65 | 13.04 | 4.91  | 3.09  |
| DPP4   | 0.83 | 19.91 | 9.98  | 6.76  | 0.72 | 12.59 | 5.56  | 4.00  |
| DRD3   | 0.75 | 0.83  | 1.79  | 2.00  | 0.55 | 1.04  | 0.92  | 0.81  |
| DYR    | 0.88 | 62.51 | 14.72 | 7.62  | 0.81 | 35.60 | 10.13 | 5.93  |
| EGFR   | 0.91 | 38.41 | 14.84 | 7.71  | 0.87 | 32.13 | 11.22 | 6.70  |
| ESR1   | 0.90 | 24.09 | 8.36  | 6.29  | 0.85 | 44.25 | 12.49 | 6.95  |
| ESR2   | 0.91 | 28.10 | 9.81  | 6.70  | 0.85 | 35.19 | 11.83 | 6.57  |
| FA7    | 0.93 | 51.12 | 15.81 | 7.99  | 0.89 | 26.44 | 11.60 | 6.50  |
| FA10   | 0.68 | 8.22  | 3.02  | 2.72  | 0.61 | 10.47 | 4.32  | 2.68  |
| FABP4  | 0.91 | 13.02 | 11.12 | 7.03  | 0.85 | 34.74 | 8.56  | 6.61  |
| FGFR1  | 0.51 | 1.70  | 1.03  | 1.23  | 0.49 | 0.00  | 0.73  | 0.79  |
| FAK1   | 0.94 | 50.66 | 18.03 | 9.10  | 0.93 | 39.52 | 15.83 | 8.90  |
| FKB1A  | 0.87 | 11.01 | 12.03 | 6.82  | 0.68 | 3.67  | 3.10  | 2.27  |
| FNTA   | 0.86 | 49.52 | 12.87 | 6.86  | 0.77 | 18.76 | 7.13  | 4.63  |
| FPPS   | 1.00 | 99.31 | 20.01 | 10.00 | 1.00 | 99.31 | 20.01 | 10.00 |
| GCR    | 0.68 | 22.17 | 6.29  | 3.80  | 0.67 | 22.17 | 6.13  | 3.72  |
| GLCM   | 0.78 | 30.38 | 13.01 | 6.67  | 0.76 | 26.59 | 9.67  | 5.93  |
| GRIA2  | 0.72 | 36.28 | 9.24  | 4.94  | 0.71 | 26.73 | 8.36  | 4.75  |
| GRIK1  | 0.78 | 24.14 | 7.75  | 4.86  | 0.68 | 5.03  | 3.97  | 2.48  |
| HDAC2  | 0.88 | 10.29 | 6.93  | 6.76  | 0.53 | 9.21  | 2.27  | 1.62  |
| HDAC8  | 0.90 | 60.91 | 16.14 | 8.24  | 0.83 | 44.94 | 12.84 | 6.89  |
| HIVINT | 0.82 | 17.09 | 11.83 | 8.21  | 0.60 | 1.01  | 0.60  | 0.60  |
| HIVPR  | 0.81 | 8.96  | 4.93  | 4.59  | 0.82 | 12.88 | 7.17  | 5.11  |
| HIVRT  | 0.59 | 14.56 | 4.44  | 2.69  | 0.58 | 15.16 | 4.20  | 2.55  |
| HMDH   | 0.90 | 48.38 | 14.60 | 8.12  | 0.89 | 45.43 | 14.01 | 7.77  |
| HS90A  | 0.67 | 47.07 | 9.56  | 4.78  | 0.65 | 17.22 | 7.97  | 4.33  |
| HXK4   | 0.99 | 45.98 | 16.57 | 9.79  | 0.98 | 48.17 | 16.35 | 9.68  |
| IGF1R  | 0.82 | 36.68 | 12.44 | 6.42  | 0.62 | 14.26 | 3.38  | 2.03  |
| INHA   | 0.59 | 7.02  | 5.15  | 2.80  | 0.54 | 9.36  | 3.75  | 1.86  |
| ITAL   | 0.60 | 24.13 | 6.68  | 3.34  | 0.49 | 16.09 | 4.21  | 2.10  |
| JAK2   | 0.90 | 40.78 | 16.49 | 8.32  | 0.72 | 19.92 | 6.56  | 4.12  |
| KIF11  | 0.80 | 10.48 | 8.18  | 5.57  | 0.79 | 39.29 | 10.97 | 6.27  |
| KIT    | 0.73 | 2.43  | 1.45  | 1.87  | 0.53 | 3.04  | 1.57  | 1.15  |
| KITH   | 0.90 | 41.48 | 14.83 | 7.39  | 0.87 | 45.08 | 12.71 | 6.86  |
| KPCB   | 0.76 | 52.03 | 10.83 | 5.93  | 0.70 | 37.91 | 9.49  | 5.70  |
| LCK    | 0.81 | 16.44 | 10.72 | 5.72  | 0.65 | 7.39  | 2.67  | 2.29  |
| LKHA4  | 0.91 | 38.87 | 14.28 | 7.78  | 0.91 | 33.57 | 13.11 | 7.37  |
| MAPK2  | 0.89 | 42.59 | 14.26 | 7.53  | 0.87 | 31.69 | 12.28 | 6.93  |
| MCR    | 0.72 | 13.26 | 3.70  | 2.83  | 0.72 | 13.26 | 3.70  | 2.83  |
| MET    | 0.91 | 46.20 | 14.00 | 8.56  | 0.85 | 50.45 | 13.16 | 6.93  |
| MK01   | 0.92 | 43.68 | 15.47 | 7.73  | 0.83 | 34.69 | 8.62  | 4.69  |
| MK10   | 0.87 | 11.59 | 10.40 | 7.99  | 0.64 | 3.86  | 2.31  | 1.73  |
| MK14   | 0.71 | 6.41  | 6.41  | 3.95  | 0.64 | 11.43 | 3.98  | 2.68  |

|       |      |       |       |       |      |       |       |       |
|-------|------|-------|-------|-------|------|-------|-------|-------|
| MMP13 | 0.93 | 55.57 | 16.20 | 8.46  | 0.87 | 38.56 | 12.21 | 6.92  |
| MP2K1 | 0.75 | 20.85 | 12.42 | 6.28  | 0.55 | 19.18 | 4.14  | 2.23  |
| NOS1  | 0.70 | 11.08 | 11.02 | 5.70  | 0.57 | 2.01  | 2.81  | 2.40  |
| NRAM  | 0.97 | 52.78 | 17.33 | 9.49  | 0.91 | 18.63 | 11.35 | 7.43  |
| PA2GA | 0.74 | 5.08  | 4.05  | 3.74  | 0.85 | 40.68 | 12.16 | 6.57  |
| PARP1 | 0.90 | 46.14 | 14.18 | 8.17  | 0.77 | 17.55 | 6.89  | 4.45  |
| PDE5A | 0.69 | 12.82 | 7.74  | 4.12  | 0.63 | 22.38 | 4.98  | 2.99  |
| PGH1  | 0.68 | 6.70  | 2.16  | 1.39  | 0.62 | 2.06  | 1.95  | 1.64  |
| PGH2  | 0.83 | 49.46 | 11.32 | 6.07  | 0.82 | 36.81 | 10.44 | 5.70  |
| PLK1  | 0.88 | 29.24 | 13.84 | 7.67  | 0.66 | 6.60  | 2.43  | 1.59  |
| PNPH  | 0.93 | 53.48 | 14.78 | 7.77  | 0.93 | 53.48 | 14.78 | 7.77  |
| PPARA | 0.89 | 16.36 | 9.33  | 6.38  | 0.89 | 24.94 | 10.41 | 6.49  |
| PPARD | 0.89 | 8.75  | 8.08  | 6.42  | 0.80 | 10.84 | 5.17  | 4.21  |
| PPARG | 0.83 | 10.35 | 6.98  | 4.90  | 0.82 | 21.53 | 8.60  | 5.48  |
| PRGR  | 0.75 | 34.57 | 7.99  | 4.34  | 0.68 | 4.45  | 1.84  | 1.95  |
| PTN1  | 0.61 | 14.64 | 8.78  | 4.92  | 0.58 | 10.02 | 3.85  | 2.31  |
| PUR2  | 0.99 | 34.80 | 18.81 | 10.00 | 0.99 | 2.05  | 19.21 | 9.80  |
| PYGM  | 0.83 | 7.95  | 7.79  | 7.40  | 0.50 | 1.33  | 1.04  | 0.52  |
| PYRD  | 0.89 | 51.23 | 14.63 | 7.85  | 0.89 | 51.23 | 14.63 | 7.85  |
| RENI  | 0.64 | 9.66  | 4.24  | 2.89  | 0.62 | 9.66  | 4.43  | 2.60  |
| ROCK1 | 0.78 | 9.08  | 6.82  | 5.51  | 0.56 | 2.02  | 2.21  | 2.00  |
| RXRA  | 0.94 | 34.41 | 14.22 | 8.63  | 0.93 | 39.00 | 15.45 | 8.32  |
| SAHH  | 1.00 | 54.86 | 20.09 | 10.02 | 1.00 | 1.61  | 20.09 | 10.02 |
| SRC   | 0.73 | 25.77 | 8.71  | 4.70  | 0.61 | 8.59  | 2.79  | 1.79  |
| TGFR1 | 0.95 | 48.88 | 17.45 | 8.95  | 0.79 | 28.58 | 8.42  | 4.59  |
| THB   | 0.95 | 35.31 | 15.96 | 8.36  | 0.96 | 70.62 | 16.73 | 8.55  |
| THRB  | 0.86 | 32.16 | 12.45 | 6.64  | 0.65 | 5.43  | 3.43  | 2.43  |
| TRY1  | 0.94 | 43.58 | 15.86 | 8.51  | 0.77 | 10.73 | 5.75  | 4.17  |
| TRYB1 | 0.84 | 16.39 | 11.51 | 6.02  | 0.67 | 8.88  | 2.57  | 2.37  |
| TYSY  | 0.84 | 23.88 | 9.55  | 6.98  | 0.85 | 37.66 | 12.49 | 7.26  |
| UROK  | 0.94 | 30.25 | 14.94 | 9.45  | 0.54 | 2.47  | 2.47  | 1.85  |
| VGFR2 | 0.76 | 11.75 | 6.80  | 4.45  | 0.70 | 8.81  | 3.77  | 2.67  |
| WEE1  | 0.99 | 59.60 | 18.10 | 9.33  | 0.99 | 0.99  | 17.90 | 9.52  |
| XIAP  | 0.96 | 44.57 | 18.43 | 9.40  | 0.93 | 44.58 | 16.61 | 8.49  |

**Table S2.** SMILES for all specified substructures for all targeted libraries

| Target Name | SMILES for specified substructures      |
|-------------|-----------------------------------------|
| AA2AR       | n12c(ncn1)ncnc2N<br>c12c([nH]cn1)ncnc2N |
| ABL1        | n1ccnc1N<br>n1cnccc1N                   |
| ACE         | C(=O)(O)CNC=O                           |
| ACES        | c12c(cccc1)nccc2N                       |

---

|       |                                                                   |
|-------|-------------------------------------------------------------------|
| ADA   | c1[nH]cnc1                                                        |
| ADA17 | c1cc(ccc1O)S(=O)(=O)N                                             |
| ADRB1 | C(N)C(O)C                                                         |
| ADRB2 | C(N)C(O)C                                                         |
| AKT1  | c12c([nH]cc1)ncnc2<br>c12c([nH]cc1)ncec2<br>[nH]1c2c(nc1)ncec2    |
| AKT2  | C1CNCCC1<br>c1cccn1                                               |
| ALDR  | CC(=O)O                                                           |
| AMPC  | C(=O)(CCS=O)O<br>C(=O)(C[N]C=O)O                                  |
| ANDR  | C12(C(CCC1)C1C(CC2)C2(C(CC1)CCCC2)C)C                             |
| AOFB  | NCC=C                                                             |
| BACE1 | C(CNC=O)O                                                         |
| BRAF  | C1CC(CCN1)n1ncec1<br>c1cc(ccn1)c1n[nH]cc1<br>c1cc(ccn1)c1[nH]cnc1 |
| CAH2  | S(=O)(=O)N                                                        |
| CASP3 | C(=O)(O)CCC=O                                                     |
| CDK2  | c1ncnc1                                                           |
| COMT  | c1(c(cccc1N(=O)O)O)O                                              |
| CP2C9 | c1cc(ccc1)c1cccc1<br>c1cc(ccc1)c1cnc1                             |
| CP3A4 | c1ncsc1<br>c1[nH]cnc1                                             |
| CSF1R | c1cccc1N                                                          |
| CXCR4 | C1CCCCC1N                                                         |
| DEF   | N(C=O)O                                                           |
| DHI1  | C1CNCCC1<br>C1CNCCN1<br>c1cccn1                                   |
| DPP4  | C1CNCCN1C=O<br>C1CCCCN1C=O<br>C1CCN(C1)C=O                        |
| DRD3  | C1CCNC1<br>C1CNCCN1<br>C1CCCCN1                                   |
| DYR   | c1cnc(nc1N)N                                                      |
| EGFR  | c1cncnc1N                                                         |
| ESR1  | c1cccc1O                                                          |
| ESR2  | c1cccc1O                                                          |
| FA7   | c1cccc1C(=N)N                                                     |
| FA10  | S(=O)=O                                                           |

---

---

|        |                                                             |
|--------|-------------------------------------------------------------|
| FABP4  | OC(=O)C                                                     |
| FAK1   | n1ccenc1N                                                   |
| FGFR1  | c1ccccc1<br>C1CNCCN1<br>C1CCCCN1                            |
| FKB1A  | C(=O)(O)CN                                                  |
| FNTA   | c1[nH]cen1                                                  |
| FPPS   | P(=O)(CP(=O)(O)O)(O)O                                       |
| GCR    | P(=O)(CP(=O)(O)O)(O)O                                       |
| GLCM   | OCC(CO)CO<br>OCC(O)CCO                                      |
| GRIA2  | C1C[N]C(C([N]1)O)O<br>C1C[N]C(C([N]1)O)[N]                  |
| GRIK1  | C(N)C(=O)O                                                  |
| HDAC2  | C(=O)NO<br>C(=O)NCCN                                        |
| HDAC8  | C(=O)NO                                                     |
| HIVINT | C(=O)CCO<br>C(=O)CC=O                                       |
| HIVPR  | c1ccccc1S(=O)=O                                             |
| HIVRT  | c1(=O)cc[nH]c(=O)[nH]1                                      |
| HMDH   | C(=O)(O)CC(CCO)O                                            |
| HS90A  | c12c([nH]cn1)c(nen2)N                                       |
| HXX4   | c1enc(s1)NC=O                                               |
| IGF1R  | c12c(nc[nH]1)cccc2<br>c12c(cc[nH]1)encn2<br>c12n(enc1)ccnc2 |
| INHA   | c1ccccc1NC=O                                                |
| ITAL   | c1ccc(cc1Cl)Cl                                              |
| JAK2   | c1cncn1<br>c1ncccn1                                         |
| KIF11  | C1CCNC1<br>c1cc[nH]c1<br>N1=CCCN1                           |
| KIT    | c1cccc(c1)NC=O                                              |
| KITH   | c1(=O)[nH]c(=O)cc[nH]1                                      |
| KPCB   | C1CC(=O)NC1=O                                               |
| LCK    | c1cnccc1N<br>n1cnccc1N<br>n1ccccc1N                         |
| LKHA4  | c1ccccc1O                                                   |
| MAPK2  | C1CCCN1=O                                                   |
| MCR    | C12(C(CCC1)C1C(CC2)C2(C(CC1)CCCC2)C)C                       |
| MET    | c1cnccc1                                                    |

---

---

|       |                                        |
|-------|----------------------------------------|
| MK01  | [nH]1c(ccc1)C(=O)N                     |
| MK10  | c1ncccc1<br>n1ccnc1                    |
| MK14  | c1[nH]cnc1                             |
| MMP13 | ONC=O                                  |
| MP2K1 | NCCC#N                                 |
| NOS1  | NC=N                                   |
| NRAM  | O=C(O)C                                |
| PA2GA | C(=O)(O)C                              |
| PDE5A | [N]1C[N]CCC1N                          |
| PARP1 | c1ccccc1C(=O)N                         |
| PGH1  | c1ccccc1O                              |
| PGH2  | c1ccccc1S(=O)=O                        |
| PLK1  | c1c[nH]nc1<br>c1[nH]cnc1               |
| PNPH  | c12c(cc[nH]1)nc[nH]c2=O                |
| PPARA | C(=O)(CC)O<br>C(=O)(CO)O<br>C(=O)(CN)O |
| PPARD | C(=O)(CC)O<br>C(=O)(CO)O<br>C(=O)(CN)O |
| PPARG | C(=O)(CC)O<br>C(=O)(CO)O<br>C(=O)(CN)O |
| PRGR  | CC#N                                   |
| PTN1  | OCC(=O)O                               |
| PUR2  | C(=O)(CNC=O)O                          |
| PYGM  | C(CO)CCO<br>[N](C=O)CC=O               |
| PYRD  | c1cnccc1C(=O)O                         |
| RENI  | CNC(=O)C                               |
| ROCK1 | c1cnccc1                               |
| RXRA  | OC(=O)C                                |
| SAHH  | c12c(ncn1)ncnc2[N]                     |
| SRC   | c1cnenc1N<br>n1ccnc1N                  |
| TGFR1 | c1c(nccc1)C                            |
| THB   | C(=O)(CN)O<br>C(=O)(CO)O               |
| THRB  | C(=N)(C)N<br>C(=N)(N)N                 |
| TRY1  | C(=N)(C)N<br>C(=N)(N)N                 |

---

---

|       |               |
|-------|---------------|
| TRYB1 | C1CCCCN1C=O   |
|       | C1CNCCN1C=O   |
| TYSY  | C(=O)(O)CNC=O |
| UROK  | NC(=N)N       |
|       | CC(=N)N       |
| VGFR2 | c1enccc1      |
| WEE1  | C1CC(=O)NC1=O |
| XIAP  | C(=O)(N)CNC=O |

---
